# Supplementary material for: Study on mid-term outcomes of atherectomy for patients with femoral popliteal artery lesions with different Global Limb Anatomic Staging System grades
Source: PeerJ. 2024 Oct 10;12:e18189. doi: 10.7717/peerj.18189 (PMC11471144; doi:10.7717/peerj.18189)
Supplement: Supplemental Information 1 [file peerj-12-18189-s001.xlsx]

## Sheet: Sheet1
20					GLASS Ⅱ 33						GLASS Ⅲ 29						GLASS Ⅳ 34
Preoperatively ABI	postoperationABI（the next day、three months、one year、two years）				Which side of the leg	Preoperatively ABI	postoperationABI（the next day、three months、one year、two years）				Which side of the leg	Preoperatively ABI	postoperationABI（the next day、three months、one year、two years）				Which side of the leg	Preoperatively ABI	postoperationABI（the next day、three months、one year、two years）
0.02	0.63	0.43	0.45	0.3	right	0.01	0.93	0.91	0.67	0.21	right	0.22	0.33	0.23	0.01	0.01	left	0.01	0.53	0.32	0.21	0.01
0.45	1.01	0.89	1.08	0.78	left	0.28	0.71	0.65	0.54	0.22	right	0.36	0.72	0.43	0.32	0.21	right	0.1	0.89	0.76	0.67	0.32
0.01	0.88	0.65	0.68	0.54	right	0.37	0.89	0.88	0.51	0.01	left	0.37	0.86	0.87	0.38	0.21	left	0.66	0.99	0.89	0.76	0.54
0.78	0.91	0.8	0.67	0.56	left	0.52	0.98	0.88	0.65	0.43	left	0.32	0.7	0.01	0.01	0.01	right	0.01	0.19	0.21	0.21	0.01
0.43	0.98	0.62	0.5	0.3	left	0.01	0.76	0.65	0.54	0.21	left	0.29	0.87	0.57	0.23	0.01	right	0	0	0	0	0
0.51	1.06	0.76	0.74	0.32	left	0.3	0.84	0.73	0.56	0.2	left	0.35	0.65	0.65	0.32	0.21	left	0.2	0.9	0.88	0.67	1.05
0.62	0.69	0.6	0.34	0.51	left	0.66	0.82	0	0.01	0.01	right	0.3	1	0.85	0.72	0.43	right	0.45	0.92	0.88	0.65	1.08
0.71	1.01	0.85	0.8	0.7	left	0.29	0.89	0.74	0.5	0.01	right	0.01	0.53	0.43	0.32	0.21	left	0.01	0.85	0.76	0.65	0.54
0.54	0.99	0.8	0.4	0.41	right	0.48	0.99	0.76	0.74	0.54	right	0.01	0.41	0.32	0.32	0.01	left	0	0.01	0.01	0.01	0.01
0.18	0.89	0.78	0.65	0.43	right	0.66	1.01	0.94	0.76	0.87	left	0.46	0.75	0.67	0.53	0.32	left	0.6	1.01	0.98	0.87	0.65
0.65	0.91	0.53	0.52	0.43	left	0.53	0.81	0.91	0.75	0.62	right	0.58	0.78	0.7	0.65	0.32	right	0.01	0.88	0.78	0.65	0.32
0.01	0.95	0.5	0.3	0.01	left	0.01	0.43	0.32	0.43	0.4	right	0.01	0.56	0.43	0.21	0.01	left	0.01	0.32	0.21	0.21	0.01
0.38	0.86	0.68	0.73	0.6	right	0.39	0.43	0.41	0.35	0.48	left	0.01	0.7	0.56	0.32	0.01	left	0.01	0.49	0.46	0.32	0.01
0.36	0.83	0.6	0.5	0.5	left	0.29	0.38	0.38	0.27	0.25	left	0.29	0.83	0.76	0.65	0.01	right	0.27	0.69	0.55	0.43	0.32
0.01	0.85	0.65	0.54	0.23	left	0.86	0.9	0.89	0.72	0.82	left	0.45	0.65	0.55	0.42	0.21	left	0.41	0.84	0.78	0.65	0.54
0.36	0.68	0.56	0.78	0.56	right	0.17	0.62	0.6	0.52	0.32	right	0.32	0.6	0.53	0.32	0.21	left	0.29	0.67	0.54	0.32	0.1
0.01	0.69	0.01	0.01	0.4	right	0.01	0.32	0.3	0.31	0.21	left	0.01	0.75	0.81	0.67	0.32	left	0.29	0.76	0.65	0.54	0.32
0.32	0.87	0.7	0.67	0.7	right	0.4	1.02	0.99	0.89	0.65	right	0.3	0.98	0.88	0.77	0.62	left	0.01	0.89	0.76	0.68	0.32
0.7	0.97	0.66	0.77	0.8	left	0.74	0.83	0.57	0.43	0.32	left	0.38	1	0.88	0.76	0.54	left	0.01	0.63	0.54	0.42	0.32
0.01	0.78	0.5	0.3	0.01	right	0.01	0.87	0.55	0.01	0.01	right	0.01	0.49	0.32	0.21	0.01	left	0.51	0.67	0.52	0.43	0.21
	three months	six months	one years	two years	left	0.43	0.98	0.87	0.68	0.61	left	0.01	0.59	0.32	0.01	0.01	right	0.43	0.72	0.65	0.43	0.24
					right	0.01	0.6	0.52	0.31	0.21	right	0.01	0.49	0.3	0.21	0.01	right	0.01	0.5	0.32	0.21	0.01
					left	0.53	0.86	0.88	0.75	0.43	left	0.69	0.9	0.89	0.75	0.43	right	0.01	0.99	0.74	0.65	0.32
					right	0.34	0.88	0.83	0.65	0.32	right	0.45	0.01	0.01	0.01	0.01	left	0.01	0.99	0.47	0.32	0.21
					left	0.01	0.95	0.88	0.77	0.65	left	0.01	0.98	0.65	0.01	0.01	right	0.01	0.87	0.76	0.67	0.32
					left	0.01	0.92	0.88	0.72	0.6	right	0.67	0.91	0.87	0.65	0.32	right	0.01	0.59	0.43	0.32	0.01
					left	0.01	0.85	0.72	0.67	0.32	left	0.01	0.74	0.65	0.66	0.32	right	0.42	0.75	0.65	0.54	0.32
					right	0.32	1.05	0.63	0.6	0.43	right	0.67	0.98	0.88	0.76	0.54	right	0.41	0.68	0.54	0.32	0.22
					left	0.34	0.78	0.65	0.54	0.43	right	0.49	0.89	0.78	0.76	0.65	right	0.01	0.49	0.01	0.01	0.01
					left	0.2	0.8	0.23	0.01	0.01			three months	six months	one years	two years	right	0.01	0.49	0.01	0.01	0.01
					right	0.01	0.6	0.01	0.01	0.01							left	0.05	0.37	0.21	0.22	0.01
					left	0.32	0.77	0.81	0.87	0.43							left	0.45	0.51	0.43	0.32	0.21
					left	0.01	0.8	0.78	0.32	0.01							left	0.22	0.68	0.54	0.32	0.21
							three months	six months	one years	two years							right	0.01	0.65	0.54	0.32	0.01
																			three months	six months	one years	two years
				GLASS Ⅰ、Ⅱ、Ⅲ、Ⅳ、Ⅴgrades of left leg preoperatively ABI、postoperative “the next day、three months、one year、two years”							GLASS Ⅰ、Ⅱ、Ⅲ、Ⅳ、Ⅴgrades of right leg preoperatively ABI、postoperative “the next day、three months、one year、two years”
					0.02	0.63	0.43	0.45	0.3		0.01	0.88	0.65	0.68	0.54
					0.45	1.01	0.89	1.08	0.78		0.78	0.91	0.8	0.67	0.56
					0.51	1.06	0.76	0.74	0.32		0.43	0.98	0.62	0.5	0.3
					0.62	0.69	0.6	0.34	0.51		0.54	0.99	0.8	0.4	0.41
					0.71	1.01	0.85	0.8	0.7		0.65	0.91	0.53	0.52	0.43
					0.18	0.89	0.78	0.65	0.43		0.01	0.95	0.5	0.3	0.01
					0.38	0.86	0.68	0.73	0.6		0.36	0.83	0.6	0.5	0.5
					0.36	0.68	0.56	0.78	0.56		0.01	0.85	0.65	0.54	0.23
					0.01	0.69	0.01	0.01	0.4		0.7	0.97	0.66	0.77	0.8
					0.32	0.87	0.7	0.67	0.7		0.7	0.97	0.66	0.77	0.8
					0.01	0.78	0.5	0.3	0.01		0.01	0.93	0.91	0.67	0.21
					0.28	0.71	0.65	0.54	0.22		0.37	0.89	0.88	0.51	0.01
					0.52	0.98	0.88	0.65	0.43		0.48	0.99	0.76	0.74	0.54
					0.01	0.76	0.65	0.54	0.21		0.66	1.01	0.94	0.76	0.87
					0.3	0.84	0.73	0.56	0.2		0.39	0.43	0.41	0.35	0.48
					0.66	0.82	0	0.01	0.01		0.17	0.62	0.6	0.52	0.32
					0.29	0.89	0.74	0.5	0.01		0.01	0.32	0.3	0.31	0.21
					0.53	0.81	0.91	0.75	0.62		0.4	1.02	0.99	0.89	0.65
					0.01	0.43	0.32	0.43	0.4		0.01	0.87	0.55	0.01	0.01
					0.29	0.38	0.38	0.27	0.25		0.01	0.6	0.52	0.31	0.21
					0.86	0.9	0.89	0.72	0.82		0.34	0.88	0.83	0.65	0.32
					0.74	0.83	0.57	0.43	0.32		0.32	1.05	0.63	0.6	0.43
					0.43	0.98	0.87	0.68	0.61		0.01	0.6	0.01	0.01	0.01
					0.53	0.86	0.88	0.75	0.43		0.22	0.33	0.23	0.01	0.01
					0.01	0.95	0.88	0.77	0.65		0.36	0.72	0.43	0.32	0.21
					0.01	0.92	0.88	0.72	0.6		0.3	1	0.85	0.72	0.43
					0.01	0.85	0.72	0.67	0.32		0.01	0.53	0.43	0.32	0.21
					0.34	0.78	0.65	0.54	0.43		0.01	0.41	0.32	0.32	0.01
					0.2	0.8	0.23	0.01	0.01		0.58	0.78	0.7	0.65	0.32
					0.32	0.77	0.81	0.87	0.43		0.01	0.56	0.43	0.21	0.01
					0.01	0.8	0.78	0.32	0.01		0.32	0.6	0.53	0.32	0.21
					0.37	0.86	0.87	0.38	0.21		0.3	0.98	0.88	0.77	0.62
					0.32	0.7	0.01	0.01	0.01		0.38	1	0.88	0.76	0.54
					0.29	0.87	0.57	0.23	0.01		0.01	0.49	0.32	0.21	0.01
					0.35	0.65	0.65	0.32	0.21		0.01	0.59	0.32	0.01	0.01
					0.46	0.75	0.67	0.53	0.32		0.01	0.49	0.3	0.21	0.01
					0.01	0.7	0.56	0.32	0.01		0.67	0.91	0.87	0.65	0.32
					0.29	0.83	0.76	0.65	0.01		0.67	0.98	0.88	0.76	0.54
					0.45	0.65	0.55	0.42	0.21		0.49	0.89	0.78	0.76	0.65
					0.01	0.75	0.81	0.67	0.32		0.1	0.89	0.76	0.67	0.32
					0.69	0.9	0.89	0.75	0.43		0.01	0.19	0.21	0.21	0.01
					0.45	0.01	0.01	0.01	0.01		0	0	0	0	0
					0.01	0.98	0.65	0.01	0.01		0.45	0.92	0.88	0.65	1.08
					0.01	0.74	0.65	0.66	0.32		0.01	0.88	0.78	0.65	0.32
					0.01	0.53	0.32	0.21	0.01		0.01	0.32	0.21	0.21	0.01
					0.66	0.99	0.89	0.76	0.54		0.27	0.69	0.55	0.43	0.32
					0.2	0.9	0.88	0.67	1.05		0.43	0.72	0.65	0.43	0.24
					0.01	0.85	0.76	0.65	0.54		0.01	0.5	0.32	0.21	0.01
					0	0.01	0.01	0.01	0.01		0.01	0.99	0.74	0.65	0.32
					0.6	1.01	0.98	0.87	0.65		0.01	0.59	0.43	0.32	0.01
					0.01	0.49	0.46	0.32	0.01		0.42	0.75	0.65	0.54	0.32
					0.41	0.84	0.78	0.65	0.54		0.41	0.68	0.54	0.32	0.22
					0.29	0.67	0.54	0.32	0.1		0.01	0.49	0.01	0.01	0.01
					0.29	0.76	0.65	0.54	0.32		0.01	0.49	0.01	0.01	0.01
					0.01	0.89	0.76	0.68	0.32		0.01	0.65	0.54	0.32	0.01
					0.01	0.63	0.54	0.42	0.32
					0.51	0.67	0.52	0.43	0.21
					0.01	0.99	0.47	0.32	0.21
					0.01	0.87	0.76	0.67	0.32
					0.05	0.37	0.21	0.22	0.01
					0.45	0.51	0.43	0.32	0.21
					0.22	0.68	0.54	0.32	0.21
GLASS Ⅰ
1	0	0	0
1	1	1	1		GLASS Ⅰ
1	1	1	0		three months	1	1	1	1	1	1	1	1	1	1	1	1	1	1	1	1	1	1	1	1
1	1	1	0		six months	0	1	1	1	1	1	1	1	1	1	0	0	1	1	1	0	0	1	1	0
1	1	0	0		one year	0	1	1	1	0	1	0	1	0	1	0	0	1	0	0	1	0	1	1	0
1	1	1	0		two years	0	1	0	0	0	0	0	1	0	0	0	0	1	0	0	0	0	1	1	0
1	1	0	0
1	1	1	1
1	1	0	0
1	1	1	0
1	0	0	0
1	0	0	0
1	1	1	1
1	1	0	0
1	1	0	0
1	0	1	0
1	0	0	0
1	1	1	1
1	1	1	1
1	0	0	0
three months	six months	one year	two years
GLASS Ⅱ
0.01	0.93	0.91	0.67	0.21
0.28	0.71	0.65	0.54	0.22
0.37	0.89	0.88	0.51	0.01
0.52	0.98	0.88	0.65	0.43	GLASS Ⅱ
0.01	0.76	0.65	0.54	0.21	three months	1	1	1	1	1	1	1	1	1	1	1	0	0	0	1	1	0	1	1	1	1		1	1	1	1	1	1	1	1	1	1	1	1
0.3	0.84	0.73	0.56	0.2	six months	1	1	1	1	1	1	0	1	1	1	1	0	0	0	1	1	0	1	0	0	1		0	1	1	1	1	1	1	1	0	0	1	1
0.66	0.82	0	0.01	0.01	one year	1	0	0	1	0	0	0	0	1	1	1	0	0	0	1	0	0	1	0	0	1		0	1	1	1	1	1	1	1	0	0	1	0
0.29	0.89	0.74	0.5	0.01	two years	0	0	0	0	0	0	0	0	0	1	1	0	0	0	1	0	0	1	0	0	1		0	0	0	1	1	0	0	0	0	0	0	0
0.48	0.99	0.76	0.74	0.54
0.66	1.01	0.94	0.76	0.87
0.53	0.81	0.91	0.75	0.62
0.01	0.43	0.32	0.43	0.4
0.39	0.43	0.41	0.35	0.48
0.29	0.38	0.38	0.27	0.25
0.86	0.9	0.89	0.72	0.82
0.17	0.62	0.6	0.52	0.32
0.01	0.32	0.3	0.31	0.21
0.4	1.02	0.99	0.89	0.65
0.74	0.83	0.57	0.43	0.32
0.01	0.87	0.55	0.01	0.01
0.43	0.98	0.87	0.68	0.61
0.01	0.6	0.52	0.31	0.21
0.53	0.86	0.88	0.75	0.43
0.34	0.88	0.83	0.65	0.32
0.01	0.95	0.88	0.77	0.65
0.01	0.92	0.88	0.72	0.6
0.01	0.85	0.72	0.67	0.32
0.32	1.05	0.63	0.6	0.43
0.34	0.78	0.65	0.54	0.43
0.2	0.8	0.23	0.01	0.01
0.01	0.6	0.01	0.01	0.01
0.32	0.77	0.81	0.87	0.43
0.01	0.8	0.78	0.32	0.01
	three months	six months	one year	two years
GLASS Ⅲ
0.22	0.33	0.23	0.01	0.01
0.36	0.72	0.43	0.32	0.21
0.37	0.86	0.87	0.38	0.21
0.32	0.7	0.01	0.01	0.01
0.29	0.87	0.57	0.23	0.01	GLASS Ⅲ
0.35	0.65	0.65	0.32	0.21	three months	0	1	1	1	1	1	1	0	0	1	1	0	1	1	1	1	1	1	1	0	0	0	0	1	1	1	1	1	1
0.3	1	0.85	0.72	0.43	six months	0	0	1	0	0	1	1	0	0	1	1	0	0	1	0	0	1	1	1	0	0	0	1	0	1	1	1	1	1
0.01	0.53	0.43	0.32	0.21	one year	0	0	0	0	0	0	1	0	0	0	1	0	0	1	0	0	1	1	1	0	0	0	1	0	0	1	1	1	1
0.01	0.41	0.32	0.32	0.01	two years	0	0	0	0	0	0	0	0	0	0	0	0	0	0	0	0	0	1	0	0	0	0	0	0	0	0	0	0	1
0.46	0.75	0.67	0.53	0.32
0.58	0.78	0.7	0.65	0.32
0.01	0.56	0.43	0.21	0.01
0.01	0.7	0.56	0.32	0.01
0.29	0.83	0.76	0.65	0.01
0.45	0.65	0.55	0.42	0.21
0.32	0.6	0.53	0.32	0.21
0.01	0.75	0.81	0.67	0.32
0.3	0.98	0.88	0.77	0.62
0.38	1	0.88	0.76	0.54
0.01	0.49	0.32	0.21	0.01
0.01	0.59	0.32	0.01	0.01
0.01	0.49	0.3	0.21	0.01
0.69	0.9	0.89	0.75	0.43
0.45	0.01	0.01	0.01	0.01
0.01	0.98	0.65	0.01	0.01
0.67	0.91	0.87	0.65	0.32
0.01	0.74	0.65	0.66	0.32
0.67	0.98	0.88	0.76	0.54
0.49	0.89	0.78	0.76	0.65
	three months	six months	one year	two years
GLASS Ⅳ
0.01	0.53	0.32	0.21	0.01
0.1	0.89	0.76	0.67	0.32
0.66	0.99	0.89	0.76	0.54
0.01	0.19	0.21	0.21	0.01
0	0	0	0	0
0.2	0.9	0.88	0.67	1.05
0.45	0.92	0.88	0.65	1.08	GLASS Ⅳ
0.01	0.85	0.76	0.65	0.54	three months	1	1	1	0	0	1	1	1	0	1	1	0	0	1	1	1	1	1	1	1	1	0	1	1	1	0	1	1	0	0	0	0	1	1
0	0.01	0.01	0.01	0.01	six months	0	1	1	0	0	1	1	1	0	1	1	0	0	0	1	0	1	1	0	0	1	0	1	0	1	0	1	0	0	0	0	0	0	0
0.6	1.01	0.98	0.87	0.65	one year	0	1	1	0	0	1	1	1	0	1	1	0	0	0	1	0	0	1	0	0	0	0	1	0	1	0	0	0	0	0	0	0	0	0
0.01	0.88	0.78	0.65	0.32	two years	0	0	0	0	0	1	1	0	0	1	0	0	0	0	0	0	0	0	0	0	0	0	0	0	0	0	0	0	0	0	0	0	0	0
0.01	0.32	0.21	0.21	0.01
0.01	0.49	0.46	0.32	0.01
0.27	0.69	0.55	0.43	0.32
0.41	0.84	0.78	0.65	0.54
0.29	0.67	0.54	0.32	0.1
0.29	0.76	0.65	0.54	0.32
0.01	0.89	0.76	0.68	0.32
0.01	0.63	0.54	0.42	0.32
0.51	0.67	0.52	0.43	0.21
0.43	0.72	0.65	0.43	0.24
0.01	0.5	0.32	0.21	0.01
0.01	0.99	0.74	0.65	0.32
0.01	0.99	0.47	0.32	0.21
0.01	0.87	0.76	0.67	0.32
0.01	0.59	0.43	0.32	0.01
0.42	0.75	0.65	0.54	0.32
0.41	0.68	0.54	0.32	0.22
0.01	0.49	0.01	0.01	0.01
0.01	0.49	0.01	0.01	0.01
0.05	0.37	0.21	0.22	0.01
0.45	0.51	0.43	0.32	0.21
0.22	0.68	0.54	0.32	0.21
0.01	0.65	0.54	0.32	0.01
	three months	six months	one year	two years
